# Supplementary material
Source: PubMed Central journal article supplement (PMC2638101)
Supplement: supp_M800284-JLR200_JLR_Lipid_Correlation_Suppl_Fig.pdf [file supp_M800284-JLR200_JLR_Lipid_Correlation_Suppl_Fig.pdf]

Supplemental data for:

VLDL Best Predicts Aortic Root Atherosclerosis in Low Density Lipoprotein Receptor Deficient Mice

Paul A. VanderLaan<sup>†</sup>, Catherine A. Reardon<sup>†</sup>, Ronald A. Thisted<sup>‡</sup>, and Godfrey S. Getz<sup>†\*</sup>

## Supplemental Figure Legend

Figure S1. Progressive quartiles for VLDL cholesterol and upper and lower half of HDL cholesterol and the corresponding aortic root and innominate artery atherosclerotic lesion size are plotted for the entire LDLR<sup>-/-</sup> data set.

Figure S1

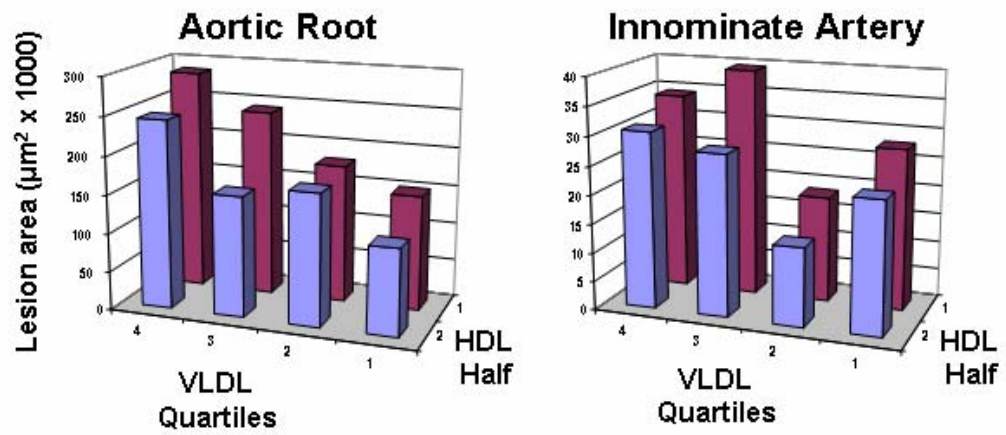

apoE<sup>-/-</sup> mice

|                                         | Total Cholesterol | Triglycerides | VLDLc | LDLc  | HDLc  | nonHDLc / HDLc |
|-----------------------------------------|-------------------|---------------|-------|-------|-------|----------------|
| <b>LDLR<sup>-/-</sup> mice</b> (n= 235) | 0.003             | 0.011         | 0.005 | 0.001 | 0.014 | 0.002          |
| <b>ApoE<sup>-/-</sup> mice</b> (n= 128) | 0.043             | 0.025         | 0.032 | 0.020 | 0.048 | 0.021          |

Each lipid variable was plotted against innominate artery lesion size and the R<sup>2</sup> value determined from the slope of the line.
